# Supplementary material for: Electronic and magnetic properties regulation of finite to infinite half sandwich organo-transition-metal-complexes functionalized graphene
Source: Royal Society of Chemistry journal article supplement (doi:10.1039/c6ra19951h), 2016-01-01
Supplement: c6ra19951h1.pdf [file c6ra19951h1.pdf]

# Electronic and Magnetic Properties Regulation of Finite to Infinite Half Sandwich Organo-Transition-Metal-Complexes Functionalized Graphene

Xiuyun Zhang<sup>a\*</sup>, Yajie Bian,<sup>a</sup> Weikang Sun,<sup>a</sup> Ting Hu,<sup>b</sup> Yongjun Liu<sup>a\*</sup>

<sup>a</sup>Department of Physics, Yangzhou University, Yangzhou 22500, China

<sup>b</sup>Department of Applied Physics and Key Laboratory of Soft Chemistry and Functional Materials (Ministry of Education), Nanjing University of Science and Technology, Nanjing, Jiangsu 210094, P. R. China

## Supporting Information

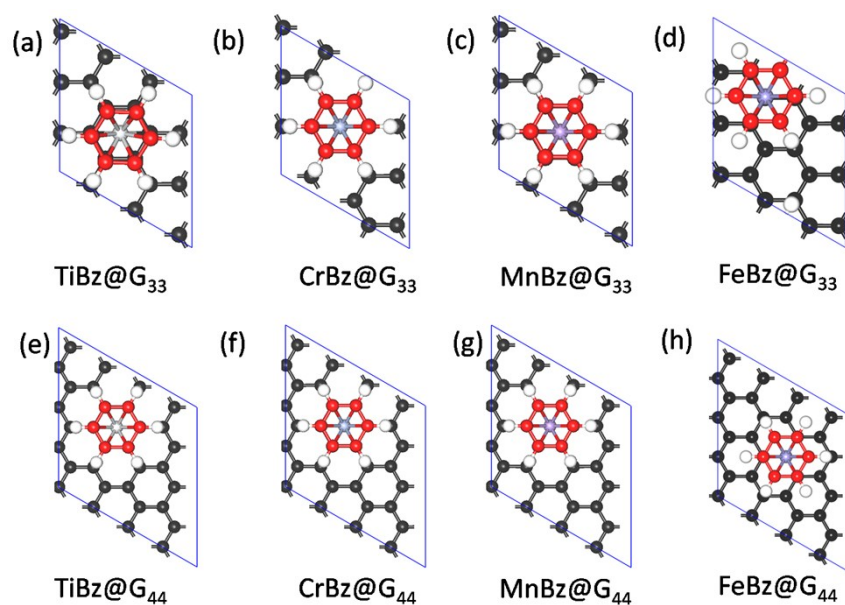

Figure S1. Optimized Structures of  $\text{TMBz@G}_{33}$  and  $\text{TMBz@G}_{44}$ .

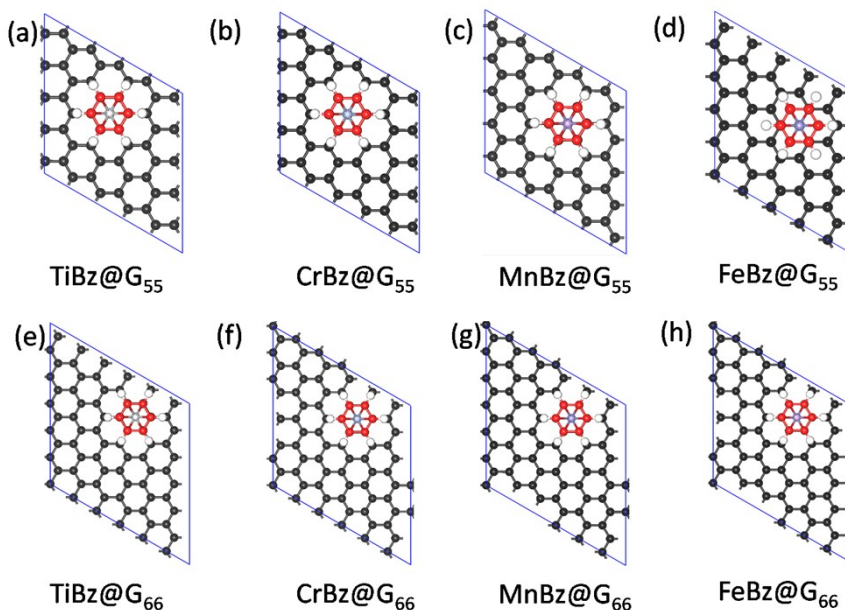

Figure S2. Optimized Structures of TMBz@G<sub>55</sub> and TMBz@G<sub>66</sub>.

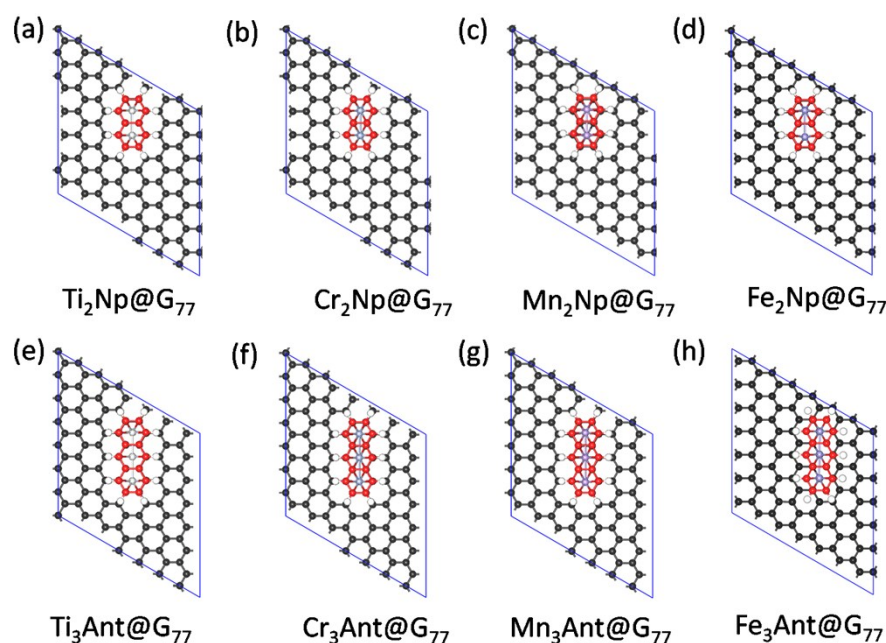

Figure S3. Optimized Structures of  $\text{TM}_2\text{Np}@G_{77}$  and  $\text{TM}_3\text{Ant}@G_{77}$ .

Table S1. The systems with finite adsorbed molecule (Sys), the C-C bond length of organic ligands ( $L_{\text{C-C(OL)}}$ ) and of graphene ( $L_{\text{C-C(G)}}$ ), the C-H bond lengths of organic ligands ( $L_{\text{C-H}}$ ), the distance of TM atom to the geometric center of organic molecules ( $D_{\text{TM-OM}}$ ) and graphene plane ( $D_{\text{TM-G}}$ ), and the distance of TM-TM ( $D_{\text{TM-TM}}$ ) atoms in FTML@SLGs system.

| Sys                 | TM | $L_{\text{C-C(OL)}}(\text{\AA})$ | $L_{\text{C-C(G)}}(\text{\AA})$ | $L_{\text{C-H}}(\text{\AA})$ | $D_{\text{TM-OM}}(\text{\AA})$ | $D_{\text{TM-G}}(\text{\AA})$ | $D_{\text{TM-TM}}(\text{\AA})$ |
|---------------------|----|----------------------------------|---------------------------------|------------------------------|--------------------------------|-------------------------------|--------------------------------|
| TMBz@G <sub>3</sub> | Ti | 1.428-1.431                      | 1.414-1.442                     | 1.089                        | 1.740                          | 1.871                         |                                |
|                     | Cr | 1.420                            | 1.414-1.441                     | 1.092                        | 1.609                          | 1.684                         |                                |
|                     | M  | 1.420,1.421                      | 1.420-1.434                     | 1.091                        | 1.537                          | 1.708                         |                                |
|                     | n  |                                  |                                 |                              |                                |                               |                                |
| TMBz@G <sub>4</sub> | Ti | 1.426-1.430                      | 1.417-1.439                     | 1.090                        | 1.749                          | 1.730                         |                                |
|                     | Cr | 1.423                            | 1.417-1.436                     | 1.091                        | 1.589                          | 1.687                         |                                |
|                     | M  | 1.421                            | 1.417-1.436                     | 1.091                        | 1.543                          | 1.677                         |                                |
|                     | n  |                                  |                                 |                              |                                |                               |                                |
| TMBz@G <sub>5</sub> | Ti | 1.429,1.430                      | 1.418-1.440                     | 1.091                        | 1.736                          | 1.824                         |                                |
|                     | Cr | 1.423,1.424                      | 1.418-1.435                     | 1.091                        | 1.590                          | 1.692                         |                                |
|                     | M  | 1.420,1.421                      | 1.418-1.435                     | 1.090                        | 1.544                          | 1.677                         |                                |
|                     | n  |                                  |                                 |                              |                                |                               |                                |
| TMBz@G <sub>6</sub> | Ti | 1.425-1.428                      | 1.418-1.441                     | 1.090                        | 1.755                          | 1.824                         |                                |
|                     | Cr | 1.422                            | 1.417-1.438                     | 1.091                        | 1.596                          | 1.691                         |                                |
|                     | M  | 1.419,1.420                      | 1.420-1.436                     | 1.091                        | 1.543                          | 1.684                         |                                |
|                     | n  |                                  |                                 |                              |                                |                               |                                |

|                      |    |             |             |       |              |                   |             |
|----------------------|----|-------------|-------------|-------|--------------|-------------------|-------------|
|                      | n  |             |             |       |              |                   |             |
|                      | Fe | 1.417-1.419 | 1.422-1.435 | 1.091 | 1.561        | 2.031             |             |
| TM <sub>2</sub> Np@  | Ti | 1.406-1.470 | 1.418-1.447 | 1.090 | 1.796,1.796  | 1.898,1.898       | 2.604       |
| G <sub>77</sub>      | Cr | 1.411-1.455 | 1.418-1.441 | 1.091 | 1.672,1.672  | 1.756,1.756       | 2.626       |
|                      | M  | 1.414-1.452 | 1.416-1.444 | 1.092 | 1.584,1.700  | 1.762,1.633       | 2.735       |
|                      | n  |             |             |       |              |                   |             |
|                      | Fe | 1.418-1.467 | 1.415-1.448 | 1.091 | 1.640,1.678  | 1.755,1.703       | 2.822       |
| TM <sub>3</sub> Ant@ | Ti | 1.408-1.452 | 1.418-1.446 | 1.090 | 1.831,1.823, | 1.898,1.894,1.898 | 2.561,2.557 |
| G <sub>77</sub>      |    |             |             |       | 1.831        |                   |             |
|                      | Cr | 1.412-1.452 | 1.416-1.446 | 1.091 | 1.685,1.703, | 1.740,1.822,1.787 | 2.521,2.524 |
|                      |    |             |             |       | 1.685        |                   |             |
|                      | M  | 1.414-1.449 | 1.418-1.437 | 1.092 | 1.633,1.709, | 1.719,1.730,1.709 | 2.596,2.601 |
|                      | n  |             |             |       | 1.645        |                   |             |
|                      | Fe | 1.421-1.454 | 1.425-1.444 | 1.093 | 1.669,1.734, | 2.038,2.028,2.042 | 2.443,2.513 |
|                      |    |             |             |       | 1.675        |                   |             |

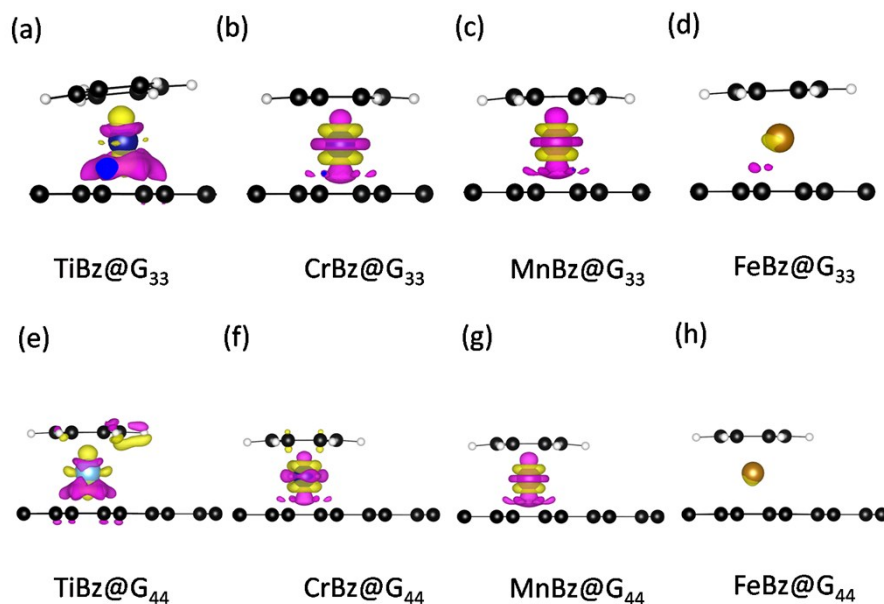

Figure S4. The charge density differences of TMBz@G<sub>33</sub> and TMBz@G<sub>44</sub>.

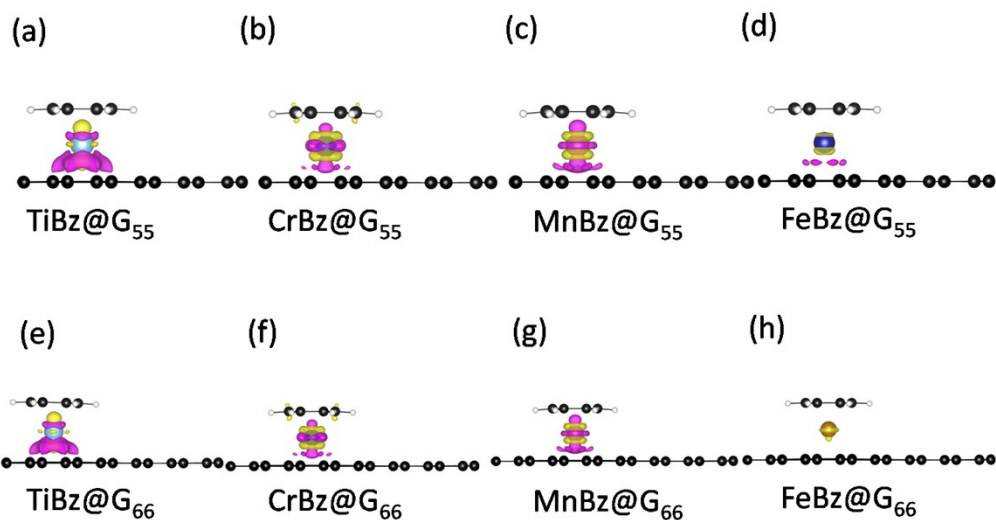

Figure S5. The charge density differences of TMBz@G<sub>55</sub> and TMBz@G<sub>66</sub>.

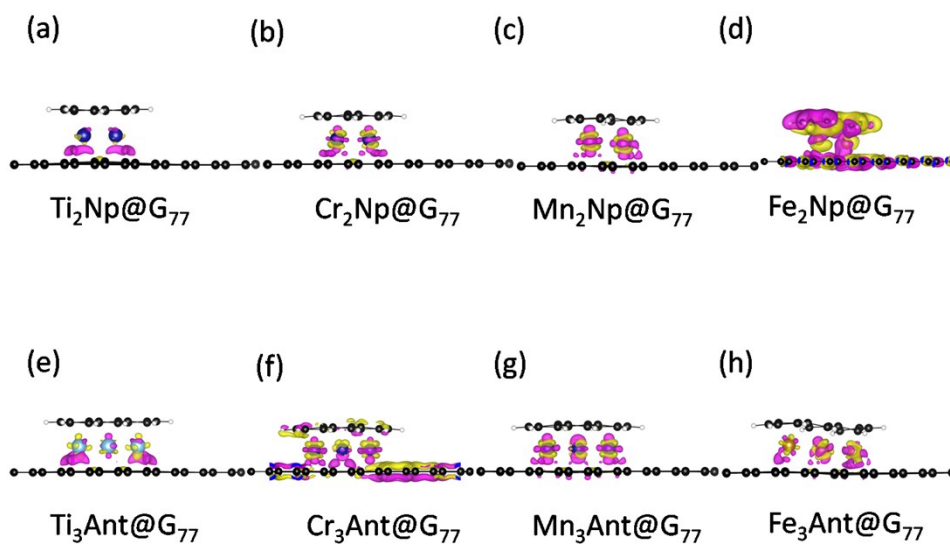

Figure S6. The charge density differences of TM<sub>2</sub>Np@G<sub>77</sub> and TM<sub>3</sub>Ant@G<sub>77</sub>.

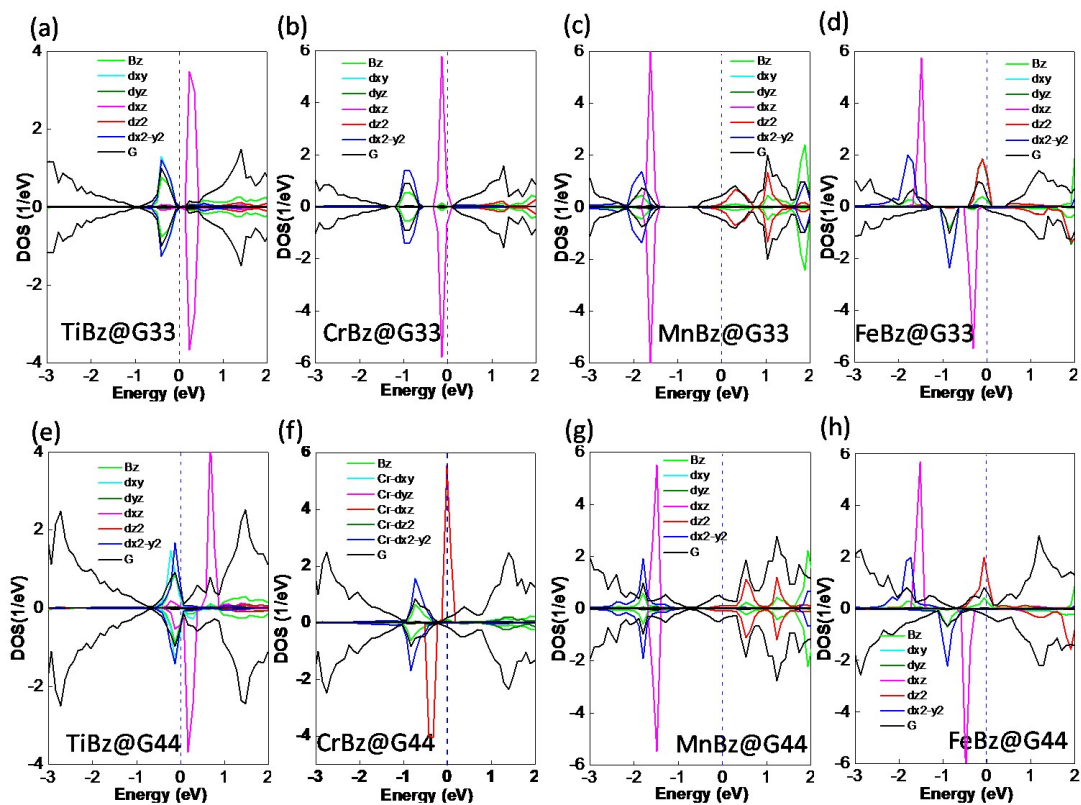

Figure S7. Density of states of of TMBz@G<sub>33</sub> and TMBz@G<sub>44</sub>.

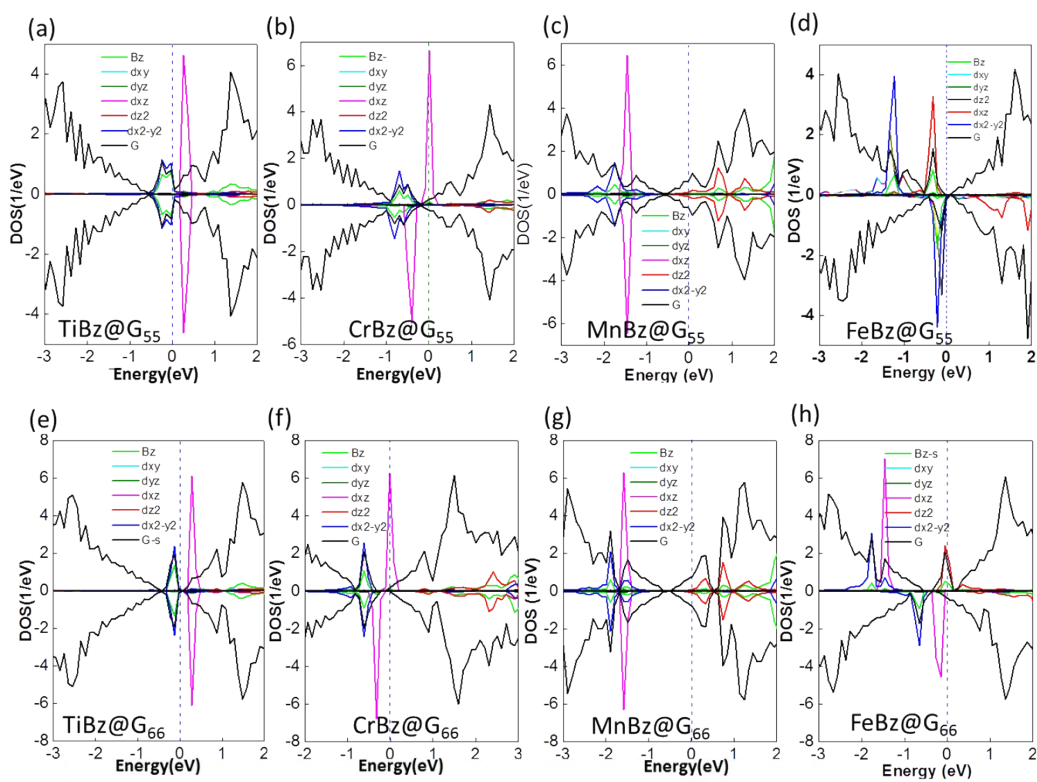

Figure S8. Density of states of of TMBz@G<sub>55</sub> and TMBz@G<sub>66</sub>.

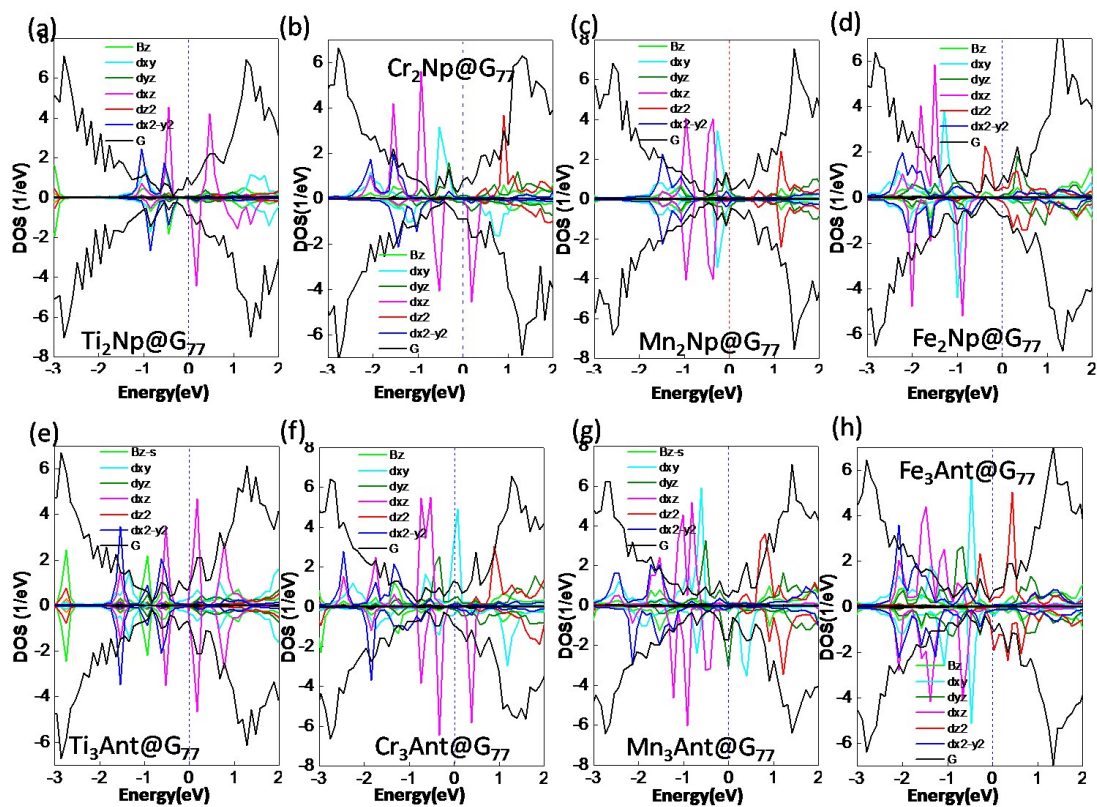

Figure S9. Density of states of of  $\text{TM}_2\text{Np}@G_{77}$  and  $\text{TM}_3\text{Ant}@G_{77}$ .

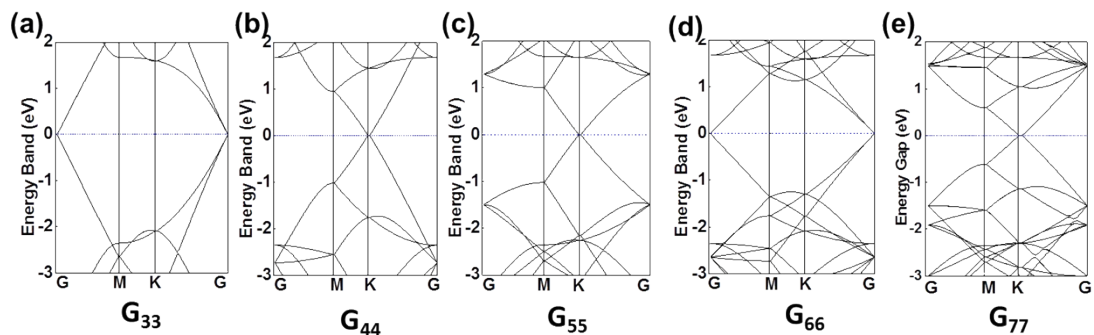

Figure S10. The electronic bandstructures of pristine graphene with different supercell,  $G_{33}$ ,  $G_{44}$ ,  $G_{55}$ ,  $G_{66}$ ,  $G_{77}$ .

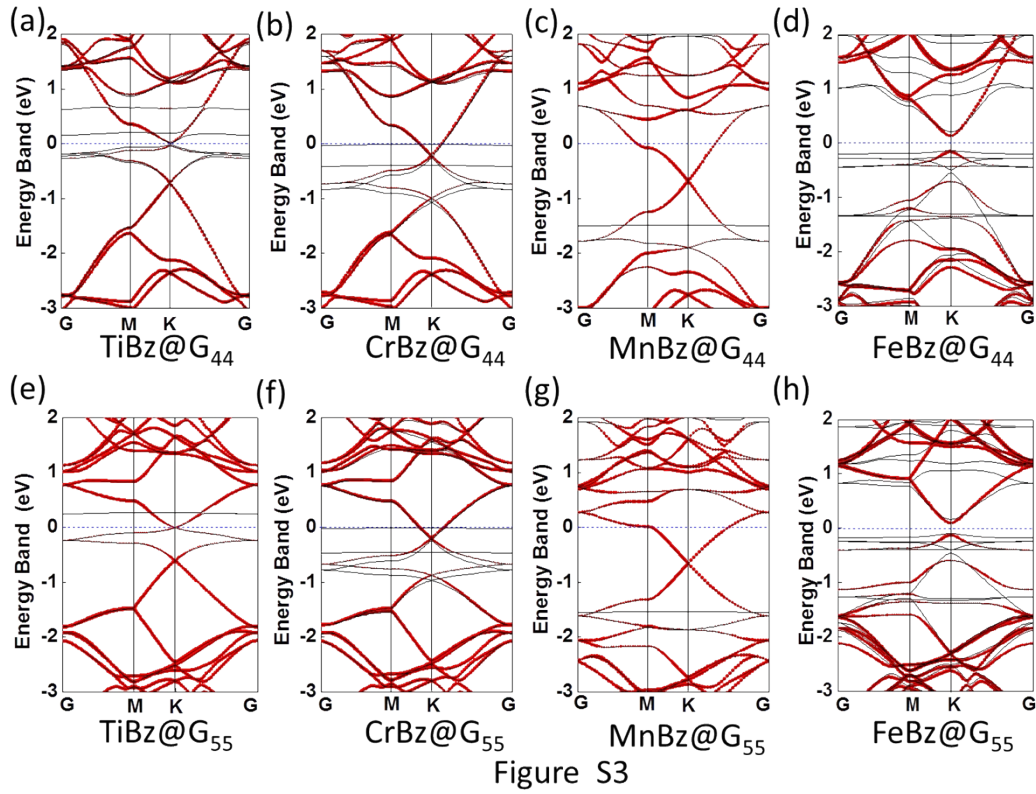

Figure S11. The electronic bandstructures of TMBz@G44 and TMBz@G55.

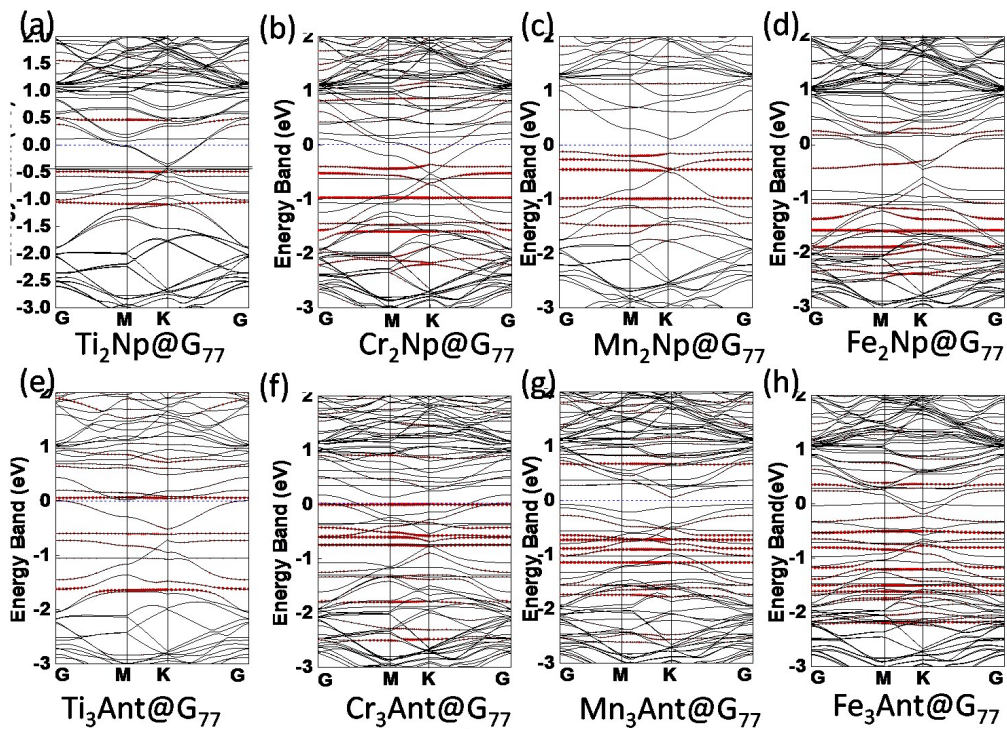

Figure S12. The electronic bandstructures of TM<sub>2</sub>Np@G77 and TM<sub>3</sub>Ant@G77.

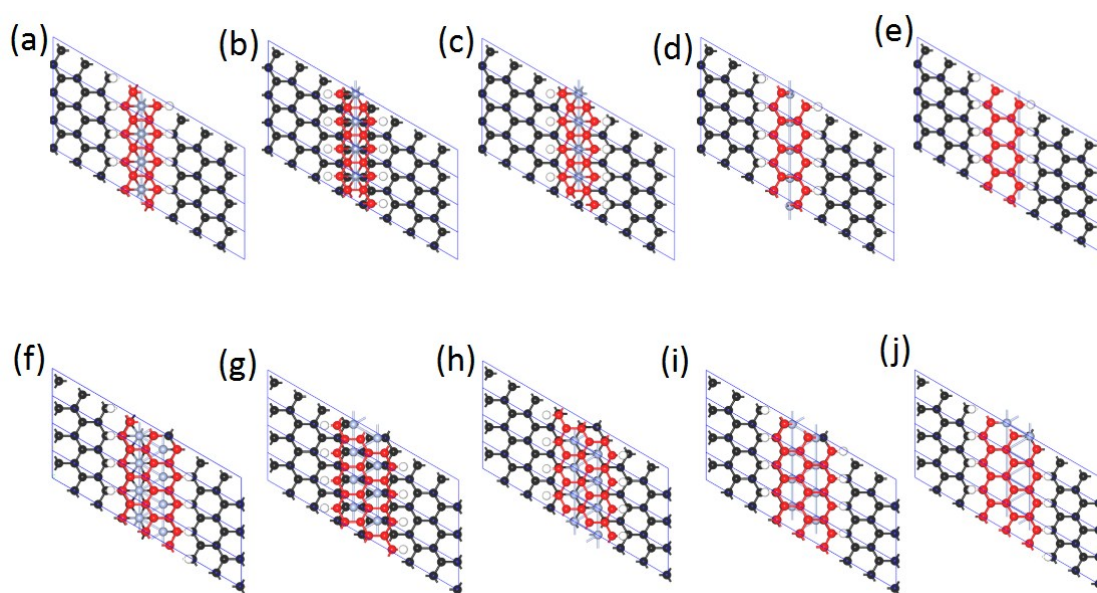

Figure S13. Schematic diagrams of one dimensional  $[\text{TMC}_4\text{H}_2]_\infty$  and  $[\text{TMC}_6\text{H}_2]_\infty$  chains bound on graphene,  $[\text{TMC}_4\text{H}_2]_\infty@G$  and  $[\text{TMC}_6\text{H}_2]_\infty@G$ : (a, f) HC-HC, (b, g) HC-BR, (c, h) HC-Top, (d, i) BR-BR, (e, j) Top-Top.

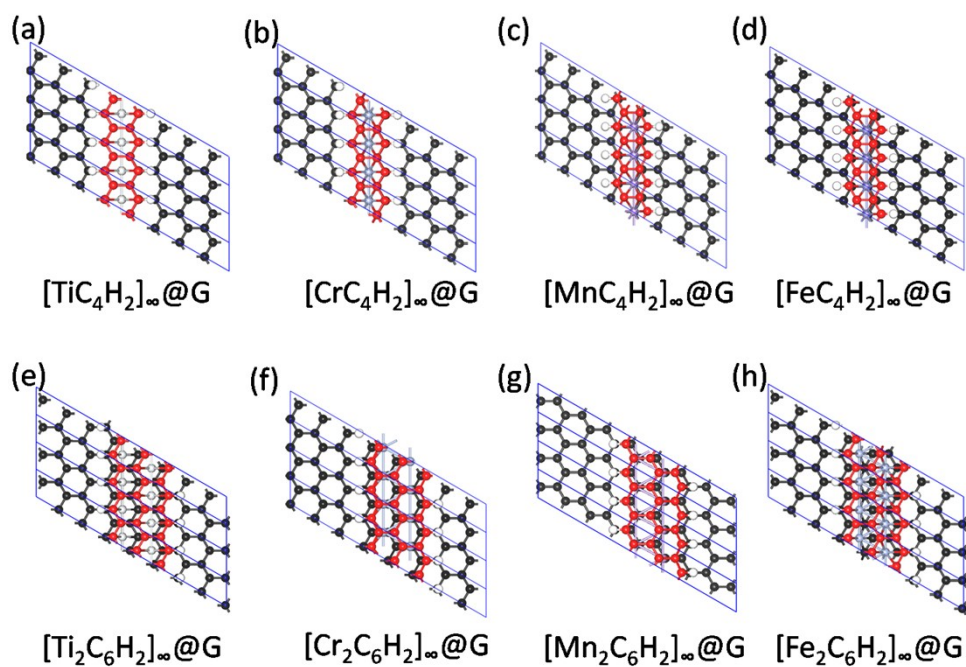

Figure S14. Optimized structures of  $[\text{TMC}_4\text{H}_2]_\infty$  and  $[\text{TMC}_6\text{H}_2]_\infty$ .



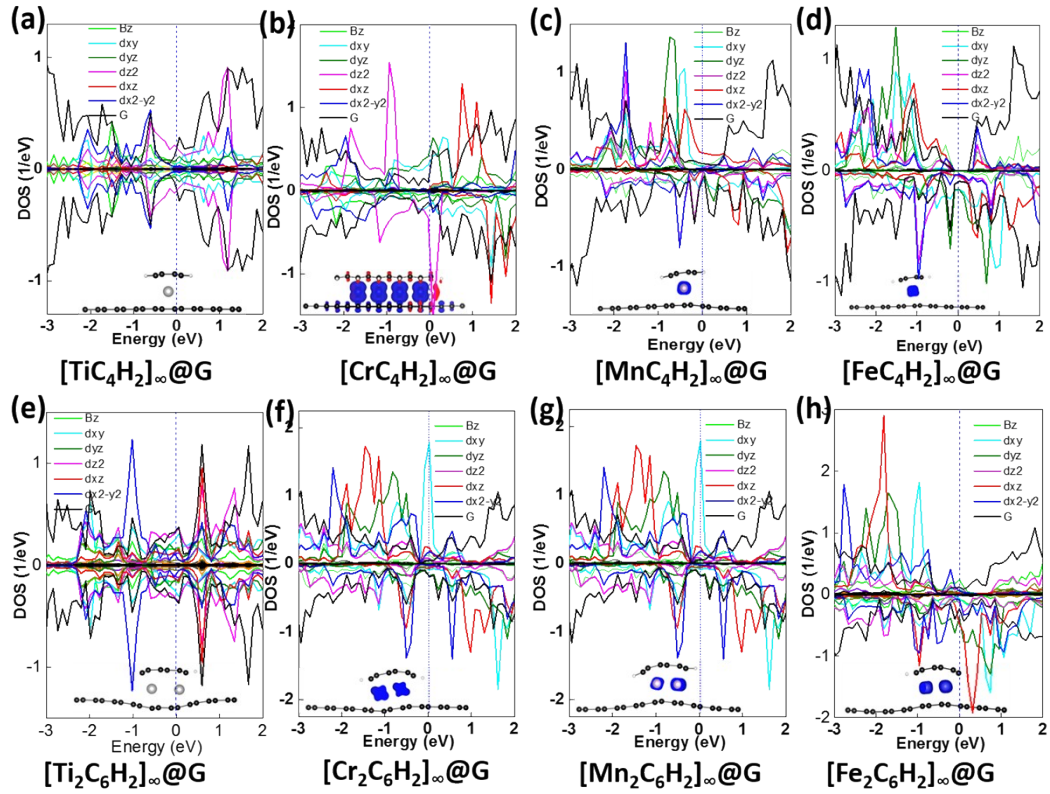

Figure S15. Density of states of (a)-(d)  $[TMC_4H_2]_\infty@G$  and (e)-(h)  $[TMC_6H_2]_\infty@G$ , TM=Ti, Cr, Mn, Fe. Insets are the spin density plots of present IFTMOL@SLGs.

Table S2. The systems with infinite adsorbed molecule wires, the C-C bond length of organic ligands ( $L_{C-C(OL)}$ ) and of graphene ( $L_{C-C(G)}$ ), the C-H bond lengths of organic ligands ( $L_{C-H}$ ), the distance of TM atom to the geometric center of organic molecules ( $D_{TM-OM}$ ) and graphene plane ( $D_{TM-G}$ ), and the distance of TM-TM ( $D_{TM-TM}$ ) atoms in IFTMOL@Gs system.

| Sys                   | TM | $L_{C-C(OM)}$ (Å) | $L_{C-C(G)}$ (Å) | $L_{C-H}$ (Å) | $D_{TM-OM}$ (Å) | $D_{TM-G}$ (Å) | $D_{TM-TM}$ (Å) |
|-----------------------|----|-------------------|------------------|---------------|-----------------|----------------|-----------------|
| $[TMC_4H_2]_\infty@G$ | Ti | 1.425-            | 1.436-           | 1.091         | 1.866           | 1.929          |                 |
|                       |    | 1.444             | 1.438            |               |                 |                |                 |
|                       | Cr | 1.421-            | 1.423-           | 1.091         | 1.739           | 1.799          |                 |
|                       |    | 1.444             | 1.436            |               |                 |                |                 |
|                       | Mn | 1.419-            | 1.422-           | 1.091-        | 1.715           | 1.748          |                 |
|                       |    | 1.448             | 1.434            | 1.092         |                 |                |                 |
|                       | Fe | 1.417-            | 1.425-           | 1.090         | 1.755           | 2.020          |                 |
|                       |    | 1.463             | 1.448            |               |                 |                |                 |
| $[TMC_6H_2]_\infty@G$ | Ti | 1.421-            | 1.423-           | 1.892-        | 2.444,1.89      | 1.901,2.35     | 2.950           |
|                       |    | 1.456             | 1.459            | 1.092         |                 |                |                 |
|                       | Cr | 1.421-            | 1.425-           | 1.093,1.095   | 2.206,1.96      | 2.019,2.12     | 2.691           |
|                       |    | 1.450             | 1.446            | 5             |                 |                |                 |

|    |                 |                 |       |                 |                 |       |
|----|-----------------|-----------------|-------|-----------------|-----------------|-------|
| Mn | 1.426-<br>1.446 | 1.425-<br>1.465 | 1.093 | 2.127,2.06<br>7 | 2.112,2.09<br>4 | 2.643 |
| Fe | 1.421-<br>1.450 | 1.420-<br>1.445 | 1.093 | 2.407,2.36<br>5 | 2.439,2.46<br>8 | 2.455 |

| Sys                                       | T<br>M | $L_{C-C(OM)}(\text{Å})$ | $L_{C-C(G)}(\text{Å})$ | $L_{C-H}(\text{Å})$ | $D_{TM-OM}(\text{Å})$ | $D_{TM-G}(\text{Å})$ | $D_{TM-TM}(\text{Å})$ | EG                                    | $E_b(\text{eV})$ | MM( $\mu_B$ ) |
|-------------------------------------------|--------|-------------------------|------------------------|---------------------|-----------------------|----------------------|-----------------------|---------------------------------------|------------------|---------------|
| [TMC <sub>4</sub> H <sub>2</sub> ]<br>∞@G | Ti     | 1.425-<br>1.444         | 1.436-<br>1.438        | 1.091               | 1.866                 | 1.929                |                       | Ti <sup>-1.0579L+0.5399G+0.5181</sup> | -3.75            | 0.00          |
|                                           | Cr     | 1.421-<br>1.444         | 1.423-<br>1.436        | 1.091               | 1.739                 | 1.799                |                       | Cr <sup>-0.8759L+0.4083G+0.4676</sup> | -0.91            | 0.83          |
|                                           | Mn     | 1.419-<br>1.448         | 1.422-<br>1.434        | 1.091-<br>1.092     | 1.715                 | 1.748                |                       | Mn <sup>-0.77L+0.3408G+0.4293</sup>   | -0.95            | 2.36          |
|                                           | Fe     | 1.417-<br>1.463         | 1.425-<br>1.448        | 1.090               | 1.755                 | 2.020                |                       | Fe <sup>-0.6656L+0.3232G+0.3423</sup> | -1.92            | 2.00          |
|                                           | Ti     | 1.421-<br>1.456         | 1.423-<br>1.459        | 1.892-<br>1.092     | 2.444,1.89<br>2       | 1.901,2.35<br>7      | 2.950                 | Ti <sup>-1.7288L+0.8225G+0.9063</sup> | -7.97            | 0.00          |
|                                           | Cr     | 1.421-<br>1.450         | 1.425-<br>1.446        | 1.093,1.095         | 2.206,1.96<br>5       | 2.019,2.12<br>6      | 2.691                 | Cr <sup>-1.3897L+0.6898G+0.7</sup>    | -3.17            | 1.28          |
| [TMC <sub>6</sub> H <sub>2</sub> ]<br>∞@G | Mn     | 1.426-<br>1.446         | 1.425-<br>1.465        | 1.093               | 2.127,2.06<br>7       | 2.112,2.09<br>4      | 2.643                 | Mn <sup>-1.1672L+0.6228G+0.5444</sup> | -3.36            | 5.03          |
|                                           | Fe     | 1.421-<br>1.450         | 1.420-<br>1.445        | 1.093               | 2.407,2.36<br>5       | 2.439,2.46<br>8      | 2.455                 | Fe <sup>-0.9972L+0.531G+0.4665</sup>  | -5.20            | 4.4312        |

| Sys             | TM | $L_{C-C(OM)}(\text{Å})$ | $L_{C-C(G)}(\text{Å})$ | $L_{C-H}(\text{Å})$ | $D_{TM-OM}(\text{Å})$ | $D_{TM-G}(\text{Å})$ | $D_{TM-TM}(\text{Å})$ | EG                                    | $E_b(\text{eV})$ | MM( $\mu_B$ ) |
|-----------------|----|-------------------------|------------------------|---------------------|-----------------------|----------------------|-----------------------|---------------------------------------|------------------|---------------|
| [TM@B<br>LG]1:2 | Ti | 1.426                   | 1.426                  |                     | 1.997                 | 1.996                |                       | Ti <sup>0.7469Bz+0.3748G+0.3721</sup> | -3.27            | -0.0001       |
|                 | Cr | 1.426                   | 1.426                  |                     | 2.006                 | 2.005                |                       | Cr <sup>0.5544Bz+0.2793G+0.275</sup>  | -0.90            | 0.5076        |

|                   |    |                 |                 |                         |       |        |       |                                                         |       |         |
|-------------------|----|-----------------|-----------------|-------------------------|-------|--------|-------|---------------------------------------------------------|-------|---------|
|                   | Mn | 1.428           | 1.428           |                         | 2.503 | 2.504  |       | Mn <sup>-</sup><br>0.3821B <sub>Z</sub> +0.1889G+0.1932 | -2.24 | 1.5261  |
|                   | Fe | 1.426           | 1.426           |                         | 5.417 | 10.089 |       | Fe <sup>-</sup><br>0.0058B <sub>Z</sub> +0.003G+0.0028  | -3.15 | 2.8143  |
| 2D-TMBz(2)        | Ti | 1.422           | 1.422           |                         | 1.892 | 1.892  |       | Ti <sup>-</sup><br>1.2536B <sub>Z</sub> +0.6269G+0.6268 | -3.21 | 1.2177  |
|                   | Cr | 1.426-<br>1.427 | 1.426-<br>1.427 |                         | 1.878 | 1.878  |       | Cr <sup>-</sup><br>1.056B <sub>Z</sub> +0.5272G+0.5287  | -0.52 | 3.5776  |
|                   | Mn | 1.426-<br>1.427 | 1.426-<br>1.427 |                         | 1.834 | 1.834  |       | Mn <sup>-</sup><br>0.9752B <sub>Z</sub> +0.487G+0.4882  | -0.51 | 3.0164  |
|                   | Fe | 1.424           | 1.424           |                         | 1.700 | 1.700  |       | Fe <sup>-</sup><br>0.7529B <sub>Z</sub> +0.3773G+0.3756 | -1.65 | 1.7234  |
| 2D-TMBz(3)        | Ti | 1.424-<br>1.428 | 1.424-<br>1.428 |                         | 1.921 | 1.922  |       | Ti <sup>-</sup><br>1.0363B <sub>Z</sub> +0.5179G+0.5184 | -3.74 | 0.0002  |
|                   | Cr | 1.425-<br>1.434 | 1.425-<br>1.434 |                         | 1.124 | 1.768  |       | Cr <sup>-</sup><br>0.8692B <sub>Z</sub> +0.434G+0.4353  | -0.91 | 1.1240  |
|                   | Mn | 1.425-<br>1.435 | 1.425-<br>1.435 |                         | 1.739 | 1.739  |       | Mn <sup>-</sup><br>0.744B <sub>Z</sub> +0.3735G+0.3705  | -0.81 | 1.0750  |
|                   | Fe | 1.427-<br>1.431 | 1.427-<br>1.431 |                         | 1.856 | 1.859  |       | Fe <sup>-</sup><br>0.647B <sub>Z</sub> +0.3243G+0.3226  | -1.73 | 2.0564  |
| TM2D-double hex   | Ti | 1.411-<br>1.437 | 1.411-<br>1.437 |                         | 1.881 | 1.880  | 4.452 | Ti <sup>-</sup><br>2.4949B <sub>Z</sub> +1.2418G+1.2532 | -5.79 | 2.5468  |
|                   | Cr | 1.413-<br>1.432 | 1.413-<br>1.432 |                         | 1.804 | 1.804  | 4.278 | Cr <sup>-</sup><br>2.1883B <sub>Z</sub> +1.0848G+1.1035 | -0.30 | 5.5959  |
|                   | Mn | 1.413-<br>1.443 | 1.413-<br>1.443 |                         | 1.642 | 1.644  | 4.278 | Mn <sup>-</sup><br>1.7329B <sub>Z</sub> +0.8507G+0.882  | -0.79 | 0.0001  |
|                   | Fe | 1.414-<br>1.432 | 1.414-<br>1.432 |                         | 1.722 | 1.722  | 4.278 | Fe <sup>-</sup><br>1.5348B <sub>Z</sub> +0.7604G+0.7742 | -2.56 | 3.7009  |
| TM2D-double hex-2 | Ti | 1.419-<br>1.452 | 1.414-<br>1.438 | 1.08<br>3-<br>1.08<br>7 | 1.772 | 1.847  |       | Ti <sup>-</sup><br>1.3455B <sub>Z</sub> +0.6998G+0.646  | -2.73 | -0.0004 |
|                   | Cr | 1.413-<br>1.458 | 1.414-<br>1.440 | 1.08<br>4-<br>1.08<br>5 | 1.563 | 1.718  |       | Cr <sup>-</sup><br>0.9476B <sub>Z</sub> +0.4855G+0.462  | -0.39 | 0.0000  |
|                   | Mn | 1.413-<br>1.458 | 1.419-<br>1.434 | 1.08<br>3-<br>1.08<br>5 | 1.592 | 1.749  |       | Mn <sup>-</sup><br>0.8716B <sub>Z</sub> +0.3745G+0.4968 | 0.03  | 0.0094  |
|                   | Fe | 1.412-<br>1.459 | 1.420-<br>1.433 | 1.08<br>5-<br>1.08      | 1.680 | 1.842  |       | Fe <sup>-</sup><br>0.767B <sub>Z</sub> +0.3967G+0.3702  | -0.80 | 1.9999  |

| 6                               |    |                 |                 |                         |                |                |                            |                                       |       |         |
|---------------------------------|----|-----------------|-----------------|-------------------------|----------------|----------------|----------------------------|---------------------------------------|-------|---------|
| TM2D-<br>double<br>hex-22       | Ti | 1.418-<br>1.434 | 1.418-<br>1.434 |                         | 1.899          | 1.899          |                            | Ti <sup>-</sup>                       | -3.83 | 2.3368  |
|                                 |    |                 |                 |                         |                |                |                            | $1.2187B_Z+0.5983G+0.6206$            |       |         |
|                                 | Cr | 1.422-<br>1.437 | 1.422-<br>1.437 |                         | 2.079          | 2.064          |                            | Cr <sup>-</sup>                       | -1.03 | 4.4262  |
|                                 |    |                 |                 |                         |                |                |                            | $1.0191B_Z+0.5021G+0.5172$            |       |         |
| TM2D-<br>double<br>hex-<br>hole | M  | 1.420-<br>1.432 | 1.420-<br>1.432 |                         | 1.779          | 1.778          |                            | Mn <sup>0.248B_Z+0.3563G+0.3956</sup> | -0.41 | -0.0379 |
|                                 | n  | 1.420-<br>1.433 | 1.420-<br>1.433 |                         | 1.734          | 1.734          |                            | Fe <sup>-</sup>                       | -1.76 | 0.0370  |
|                                 |    |                 |                 |                         |                |                |                            | $0.7611B_Z+0.3603G+0.4008$            |       |         |
|                                 | Ti | 1.415-<br>1.448 | 1.414-<br>1.441 | 1.08<br>3-<br>1.08<br>6 | 1.826<br>1.825 | 1.904<br>1.903 | 3.737                      | Ti <sup>-</sup>                       | -9.02 | 1.9832  |
|                                 |    |                 |                 |                         |                |                | $2.4413B_Z+1.2404G+1.2009$ |                                       |       |         |
| TM2D-<br>double<br>hex-<br>hole | Cr | 1.407-<br>1.453 | 1.409-<br>1.446 | 1.08<br>2               | 1.639<br>1.639 | 1.663<br>1.663 | 4.278                      | Cr <sup>-</sup>                       | -4.03 | 0.0000  |
|                                 |    |                 |                 |                         |                |                |                            | $1.8449B_Z+0.9062G+0.939$             |       |         |
|                                 | M  | 1.408-<br>1.438 | 1.410-<br>1.443 | 1.08<br>3               | 1.612<br>1.612 | 1.663<br>1.663 | 4.246                      | Mn <sup>-</sup>                       | -3.70 | 0.0000  |
|                                 | n  | 1.407-<br>1.443 | 1.418-<br>1.430 | 1.08<br>3               | 1.663<br>1.662 | 1.777<br>1.775 | 4.293                      | Fe <sup>-</sup>                       | -5.12 | -1.7577 |
|                                 |    |                 |                 |                         |                |                | $1.5388B_Z+0.7442G+0.7945$ |                                       |       |         |
